# Supplementary material
Source: Springer Nature journal article supplement (https://www.springermedizin.de/resource/supplementary/12889_2005_431_MOESM2_ESM.pdf/9500862)
Supplement: MOESM2 [file 9500862]

## **Knowledge**

Can diabetes be cured?

Is eating too much sugar, the usual cause of diabetes?

Is the usual cause of diabetes something wrong with insulin or the pancreas?

Do children of diabetics have a higher risk of developing diabetes?

Should diabetic patients eat less fried food?

Should diabetic patients eat grapes?

Can diabetes be controlled with treatment?

Can exercise help you improve or maintain blood sugar control?

Do foot ulcers of diabetic patients take longer time to heal?

Do diabetic patients need a regular eye check?

Does urine sugar testing give as accurate a result as blood sugar testing?

When a diabetic patient feels weak, dizzy and sweaty, does S/he need to take sugar?

When the diabetes is out of control the blood sugar should be either too high or too low

## **Attitudes**

Diabetes can be controlled by just being on a diet and is a mild disease.

Noninsulin-dependent diabetes is a less serious disease than insulin-dependent diabetes.

People with diabetes who have poor blood sugar control are more likely to have diabetes complications than people who have good blood sugar control.

People whose diabetes is treated by just a diet do not have to worry about getting many long-term complications of diabetes.

Good blood sugar control will reduce the long-term complications of diabetes.

There is not much use in trying to have good blood sugar control because the complications of diabetes will happen anyway.

Having high blood sugar over a long period of times is linked to getting long-term diabetes complications.

## **Practice**

Do you have a diet plan at home?

Does your family support you in sticking to your diet?

Do you stick to your diet when you eat out?

In the past 6 months, did you check your urine at home at least once a week?

Do you check your blood sugar at home?

In the past 2 months, did you take any herbal medicine or food remedy for your diabetes?
